# Supplementary material for: Tuning Nanopore Diameter of Titanium Surfaces to Improve Human Gingival Fibroblast Response
Source: MDPI journal article supplement (doi:10.3390/ijms19102881), 2018-09-22
Supplement: s1 [file s1]

**Supplementary Table S1.** Different anodization conditions and protocols tested in order to achieve nanostructures with different porous diameters. All protocols were conducted with the electrolyte aged for 400–900 min and a peeling step with Scotch Magic® between the two anodizations.

| Electrolyte                                                       | Electrodes Interspace | Anodization Conditions     | SEM                                                                                  | Comments                                                                                                                                     |
|-------------------------------------------------------------------|-----------------------|----------------------------|--------------------------------------------------------------------------------------|----------------------------------------------------------------------------------------------------------------------------------------------|
| 0.14 M $\text{NH}_4\text{H}$<br>2.78 M $\text{H}_2\text{O}$<br>EG | 5 cm                  | 35 V 30 min<br>10 V 30 min | 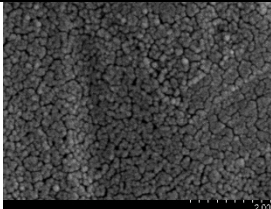   | No nanostructure was obtained.                                                                                                               |
| 0.1 M $\text{NH}_4\text{H}$<br>1.67 M $\text{H}_2\text{O}$<br>EG  | 5 cm                  | 35 V 30 min<br>10 V 30 min |    | Heterogenous surface with two layers.                                                                                                        |
| 0.1 M $\text{NH}_4\text{H}$<br>1 M $\text{H}_2\text{O}$<br>EG     | 5 cm                  | 60 V 30 min<br>10 V 2.5 h  |   | Heterogenous nanoporous surface obtained.                                                                                                    |
| 0.1 M $\text{NH}_4\text{H}$<br>1 M $\text{H}_2\text{O}$<br>EG     | 5 cm                  | 60 V 30 min<br>10 V 1 h    |  | With a shorter reaction time, a heterogenous nanoporous surface was also obtained.                                                           |
| 0.1 M $\text{NH}_4\text{F}$<br>1 M $\text{H}_2\text{O}$<br>EG     | 5 cm                  | 60 V 30min<br>60 V 10 min  |  | With a shorter reaction time and higher voltage, a homogeneous nanoporous surface obtained.<br><b>Conditions used in the study for NP-B.</b> |
| 0.1 M $\text{NH}_4\text{F}$<br>1 M $\text{H}_2\text{O}$<br>EG     | 5 cm                  | 60 V 30min<br>10 V 10 min  |  | Lower voltage.<br>Homogeneous nanoporous surface obtained. Smaller pore diameter                                                             |
| 0.1 M $\text{NH}_4\text{F}$<br>1 M $\text{H}_2\text{O}$<br>EG     | 2.5 cm                | 60 V 30min<br>1 V 10 min   |  | Lower voltage and inter-electrode spacing.<br>Heterogenous nanoporous surface obtained.                                                      |

|                                                               |        |                          |                                                                                     |                                                                                                                                         |
|---------------------------------------------------------------|--------|--------------------------|-------------------------------------------------------------------------------------|-----------------------------------------------------------------------------------------------------------------------------------------|
| 0.1 M $\text{NH}_4\text{H}$<br>1 M $\text{H}_2\text{O}$<br>EG | 5 cm   | 35 V 30 min<br>3 V 1 h   | 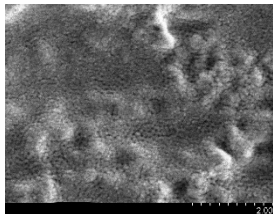  | No nanostructure was obtained.                                                                                                          |
| 0.1 M $\text{NH}_4\text{H}$<br>1 M $\text{H}_2\text{O}$<br>EG | 5 cm   | 35 V 30 min<br>1 V 1 h   |   | Lower voltage.<br>Heterogenous nanoporous surface obtained                                                                              |
| 0.1 M $\text{NH}_4\text{F}$<br>1 M $\text{H}_2\text{O}$<br>EG | 5 cm   | 35 V 30min<br>1 V 10 min |   | Lower reaction time.<br>Heterogenous nanoporous surface obtained                                                                        |
| 0.1 M $\text{NH}_4\text{F}$<br>1 M $\text{H}_2\text{O}$<br>EG | 2.5 cm | 35 V 30min<br>1 V 10 min |  | Lower voltage and inter-electrode spacing.<br>Homogeneous nanoporous surface obtained.<br><b>Conditions used in the study for NP-S.</b> |
